# Supplementary material for: Interaction of oat bran and exercise training improved exercise adaptability via alleviating oxidative stress and promoting energy homeostasis
Source: Royal Society of Chemistry journal article supplement (doi:10.1039/d4fo03374d), 2024-01-01
Supplement: d4fo03374d1.pdf [file d4fo03374d1.pdf]

Tab. S1 Metabolites significantly altered by MIET

| NAME                                                                                                    | log2 FC      | Pvalue   | fdr      | vip      |
|---------------------------------------------------------------------------------------------------------|--------------|----------|----------|----------|
| Adenosine                                                                                               | 6.522870947  | 0.001079 | 0.006066 | 1.0372   |
| 2-epahpa [dmed-fahfa]                                                                                   | 2.517687926  | 3.54E-08 | 2.01E-06 | 2.493334 |
| 1-Stearoyl-2-arachidonoyl-sn-glycerol                                                                   | 1.750531426  | 5.95E-10 | 1.07E-07 | 1.256712 |
| 5.alpha.-cholest-7-en-3.beta.-ol                                                                        | 1.485526452  | 1.25E-07 | 4.99E-06 | 1.093022 |
| N-Docosanoyl-4-sphingenyl-1-O-phosphorylcholine                                                         | 1.35181944   | 1.90E-09 | 2.04E-07 | 1.220708 |
| Pi(16:0e/15-hete)                                                                                       | 1.308459754  | 1.70E-05 | 0.000216 | 2.747641 |
| Pi(18:0/12-hepe)                                                                                        | 1.182961597  | 4.02E-05 | 0.000431 | 2.377535 |
| 2-methylamino-1-phenylbutane                                                                            | 1.129606788  | 7.81E-05 | 0.000725 | 1.303618 |
| 5-[(8as)-2,5,5,8a-tetramethyl-3-oxo-4a,6,7,8-tetrahydro-4h-naphthalen-1-yl]-3-methylpentanoic acid      | 1.057040314  | 0.000368 | 0.002491 | 1.328324 |
| Palmitoyl sphingomyelin                                                                                 | 0.992912495  | 5.23E-09 | 5.12E-07 | 5.983262 |
| Pi 38:5                                                                                                 | 0.851490421  | 0.000925 | 0.005414 | 7.46105  |
| N-oleoyl-d-erythro-sphingosylphosphorylcholine                                                          | 0.838748996  | 3.40E-07 | 1.05E-05 | 1.341487 |
| (+)-.alpha.-tocopherol                                                                                  | 0.763910371  | 1.53E-06 | 3.11E-05 | 1.700646 |
| Myristoleic acid                                                                                        | 0.619358198  | 0.009614 | 0.034862 | 1.690151 |
| Pi 38:6                                                                                                 | 0.562982916  | 0.039286 | 0.10631  | 1.857463 |
| Pe(16:1e/14-hdohe)                                                                                      | 0.544331403  | 0.017506 | 0.055782 | 1.047454 |
| Pi 36:5                                                                                                 | 0.47131616   | 0.03123  | 0.087791 | 2.175374 |
| Myristic acid                                                                                           | 0.427944887  | 0.011937 | 0.041607 | 1.814929 |
| Pi 38:4                                                                                                 | 0.391602822  | 0.016155 | 0.052407 | 2.665377 |
| Cholesteryl sulfate                                                                                     | 0.335230116  | 0.012349 | 0.042491 | 5.15875  |
| Muconic acid                                                                                            | -0.105139835 | 0.001655 | 0.008737 | 3.249323 |
| Pc(16:1e/9-hode)                                                                                        | -0.217946718 | 0.013139 | 0.044359 | 2.123357 |
| Taurine                                                                                                 | -0.224505206 | 0.000612 | 0.003767 | 1.483711 |
| (2-aminoethoxy)[2-[docosa-4.7.10.13.16.19-hexaenoyloxy]-3-[hexadec-1-en-1-yloxy]propoxy]phosphinic acid | -0.240895861 | 0.027384 | 0.080106 | 1.368188 |
| Lpc 18:2                                                                                                | -0.265862043 | 0.023063 | 0.069577 | 6.743288 |
| Choline                                                                                                 | -0.293668723 | 0.000821 | 0.004883 | 1.406391 |
| 2-oleoyl-1-palmitoyl-sn-glycero-3-phosphocholine                                                        | -0.301209455 | 0.015458 | 0.050603 | 5.549201 |
| Pc(16:1e/17-hdohe)                                                                                      | -0.302093415 | 8.01E-05 | 0.000731 | 1.333434 |
| L-palmitoylcarnitine                                                                                    | -0.320222085 | 0.000232 | 0.001733 | 1.207342 |
| Dl-lactate                                                                                              | -0.321180203 | 0.011838 | 0.041396 | 2.270773 |
| 1-arachidoyl-2-hydroxy-sn-glycero-3-phosphocholine                                                      | -0.322235823 | 0.013753 | 0.045731 | 1.495597 |
| 2-hydroxy-6-methylquinoline-3-carbaldehyde                                                              | -0.323694762 | 0.000357 | 0.002436 | 1.565278 |
| 1-Stearoyl-2-hydroxy-sn-glycero-3-phosphocholine                                                        | -0.357567902 | 7.19E-05 | 0.000679 | 4.028015 |
| 5-aminovaleric acid betaine                                                                             | -0.374696712 | 0.000628 | 0.003822 | 2.013861 |
| N-palmitoyl-d-sphingosine                                                                               | -0.376869419 | 7.07E-07 | 1.69E-05 | 1.60703  |
| 1-heptadecanoyl-sn-glycero-3-phosphocholine                                                             | -0.38305447  | 5.37E-06 | 8.76E-05 | 1.317919 |
| 1-Palmitoyllysophosphatidylcholine                                                                      | -0.388803607 | 0.001572 | 0.008379 | 1.389118 |

|                                                                                                            |              |          |          |          |
|------------------------------------------------------------------------------------------------------------|--------------|----------|----------|----------|
| L-propionylcarnitine                                                                                       | -0.392275197 | 0.006078 | 0.024984 | 1.444633 |
| 1-palmitoyl-sn-glycero-3-phosphocholine                                                                    | -0.399103613 | 9.46E-12 | 1.02E-08 | 13.24092 |
| D-fructose                                                                                                 | -0.400770518 | 4.26E-05 | 0.000441 | 2.654637 |
| D-Mannose                                                                                                  | -0.42447575  | 0.00011  | 0.000961 | 1.015799 |
| 1-Stearoyl-sn-glycerol 3-phosphocholine(LPC(18:0))                                                         | -0.435007493 | 5.81E-05 | 0.000569 | 1.024955 |
| Linoleic acid                                                                                              | -0.455453168 | 0.014222 | 0.047063 | 8.619383 |
| Arachidonic Acid (peroxide free)                                                                           | -0.458428034 | 0.005019 | 0.021536 | 4.432218 |
| L-gulono-1,4-lactone                                                                                       | -0.470536406 | 0.002635 | 0.01275  | 1.854842 |
| Oleamide                                                                                                   | -0.471935047 | 0.000236 | 0.001739 | 5.787006 |
| 1,2-diarachidonoyl-sn-glycero-3-phosphocholine                                                             | -0.473373179 | 0.000581 | 0.00362  | 1.617337 |
| 1-oleoyl-l-.alpha.-lysophosphatidic acid                                                                   | -0.50182629  | 0.016546 | 0.053514 | 1.084493 |
| ketoisocaproic acid                                                                                        | -0.504026779 | 0.002337 | 0.011599 | 1.284427 |
| Palmitic acid                                                                                              | -0.506621882 | 0.000201 | 0.001555 | 9.630645 |
| Fahfa 36:3                                                                                                 | -0.51175339  | 0.007384 | 0.029003 | 1.033419 |
| 1-hexadecyl-sn-glycero-3-phosphocholine                                                                    | -0.516294873 | 4.81E-07 | 1.30E-05 | 1.465523 |
| 1-palmitoyl-2-docosahexaenoyl-sn-glycero-3-phosphocholine                                                  | -0.519360626 | 0.000292 | 0.00207  | 7.18581  |
| D-glutamine                                                                                                | -0.543576115 | 0.006796 | 0.027414 | 1.30348  |
| Tuberostemonine                                                                                            | -0.56045775  | 2.96E-08 | 1.87E-06 | 1.886795 |
| (r)-butyrylcarnitine                                                                                       | -0.573462435 | 0.002444 | 0.011966 | 2.275981 |
| Fahfa 36:2                                                                                                 | -0.578153222 | 0.017487 | 0.055782 | 1.085746 |
| 1-(9z,12z-octadecadienoyl)-2-hydroxy-sn-glycero-3-phosphoethanolamine                                      | -0.595586856 | 0.023013 | 0.069577 | 1.519633 |
| 4-[5-[[4-[5-[acetyl(hydroxy)amino]pentylamino]-4-oxobutanoyl]-hydroxyamino]pentylamino]-4-oxobutanoic acid | -0.618484618 | 0.013757 | 0.045731 | 1.621526 |
| Fenpropidin                                                                                                | -0.627029419 | 2.83E-05 | 0.000324 | 2.508246 |
| Indolelactic acid                                                                                          | -0.667858302 | 0.000545 | 0.003451 | 1.124575 |
| Dihomo-gamma-Linolenic Acid                                                                                | -0.809670117 | 2.28E-07 | 7.82E-06 | 1.581877 |
| Oleic acid                                                                                                 | -0.814700009 | 2.47E-07 | 7.82E-06 | 4.138964 |
| DL-arginine                                                                                                | -0.907359917 | 5.29E-07 | 1.39E-05 | 1.35839  |
| Glycerophosphocholine                                                                                      | -0.943749857 | 1.03E-07 | 4.27E-06 | 4.032614 |
| Ricinoleic acid                                                                                            | -1.000709253 | 6.01E-07 | 1.49E-05 | 2.268103 |
| (4Z,7Z,10Z,13Z,16Z,19Z)-4,7,10,13,16,19-Docosahexaenoic acid                                               | -1.049038805 | 5.85E-06 | 9.27E-05 | 3.21345  |
| Pe(16:1e/14,15-epete)                                                                                      | -1.057617135 | 6.14E-05 | 0.00059  | 2.289564 |
| Heptadecaspinganine                                                                                        | -1.092718705 | 8.16E-11 | 2.93E-08 | 1.793461 |
| Sphingosine                                                                                                | -1.244316865 | 4.61E-07 | 1.30E-05 | 1.786781 |
| C17-sphinganine                                                                                            | -1.262107801 | 1.03E-09 | 1.25E-07 | 1.965432 |

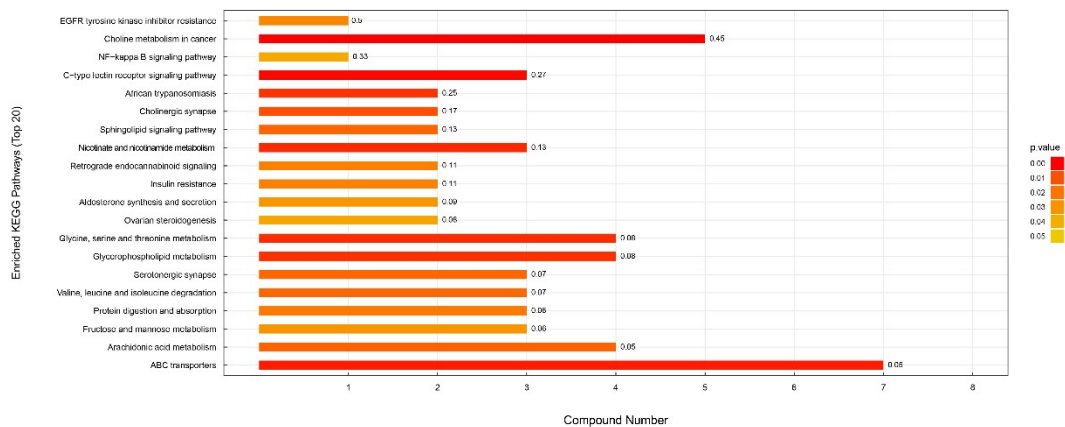

Figure S1 KEGG enrichment (OB vs NOB)
